# Supplementary material for: Assessment and Selection of Competing Models for Zero-Inflated Microbiome Data
Source: PubMed Central journal article supplement (PMC4493133; doi:10.1371/journal.pone.0129606), 2015-07-06
Supplement: pone.0129606.s001.pdf [file pone.0129606.s001.pdf]

The AIC's of different methods for data simulated under ZIP distribution with  $\phi_c = 20\%$ .

| parameters |            | One part models |         |      | Hurdle/ZI models |             |          |
|------------|------------|-----------------|---------|------|------------------|-------------|----------|
| $\phi_t$   | $\gamma_1$ | LOLS            | Poisson | NB   | 2P-LOLS          | PH/ZIP      | NBH/ZINB |
| 15%        | 0          | 3963            | 3958    | 3859 | 3815             | <b>3773</b> | 3774     |
|            | 0.2        | 4134            | 4134    | 4016 | 3955             | <b>3905</b> | 3907     |
|            | 0.6        | 4522            | 4545    | 4358 | 4214             | <b>4145</b> | 4146     |
| 20%        | 0          | 3950            | 3974    | 3846 | 3791             | <b>3749</b> | 3750     |
|            | 0.2        | 4129            | 4167    | 4009 | 3927             | <b>3878</b> | 3880     |
|            | 0.6        | 4532            | 4635    | 4365 | 4178             | <b>4113</b> | 4114     |
| 25%        | 0          | 3930            | 3983    | 3825 | 3756             | <b>3716</b> | 3718     |
|            | 0.2        | 4110            | 4194    | 3990 | 3886             | <b>3840</b> | 3841     |
|            | 0.6        | 4516            | 4704    | 4350 | 4125             | <b>4062</b> | 4064     |
