# Supplementary material for: Assessment and Selection of Competing Models for Zero-Inflated Microbiome Data
Source: PubMed Central journal article supplement (PMC4493133; doi:10.1371/journal.pone.0129606), 2015-07-06
Supplement: pone.0129606.s002.pdf [file pone.0129606.s002.pdf]

The AIC's of different methods for data simulated under ZIP distribution with  $\phi_c = 50\%$ .

| parameters |            | One part models |         |      | Hurdle/ZI models |             |          |
|------------|------------|-----------------|---------|------|------------------|-------------|----------|
| $\phi_t$   | $\gamma_1$ | LOLS            | Poisson | NB   | 2P-LOLS          | PH/ZIP      | NBH/ZINB |
| 45%        | 0          | 3472            | 3804    | 3267 | 3129             | <b>3101</b> | 3103     |
|            | 0.2        | 3645            | 4065    | 3421 | 3244             | <b>3212</b> | 3213     |
|            | 0.6        | 4013            | 4718    | 3723 | 3432             | <b>3388</b> | 3389     |
| 50%        | 0          | 3411            | 3762    | 3184 | 3047             | <b>3020</b> | 3022     |
|            | 0.2        | 3573            | 4025    | 3325 | 3150             | <b>3120</b> | 3121     |
|            | 0.6        | 3932            | 4699    | 3616 | 3329             | <b>3287</b> | 3288     |
| 55%        | 0          | 3337            | 3700    | 3090 | 2951             | <b>2926</b> | 2928     |
|            | 0.2        | 3496            | 3968    | 3226 | 3050             | <b>3022</b> | 3023     |
|            | 0.6        | 3835            | 4643    | 3494 | 3210             | <b>3170</b> | 3172     |
