# Supplementary material for: Assessment and Selection of Competing Models for Zero-Inflated Microbiome Data
Source: PubMed Central journal article supplement (PMC4493133; doi:10.1371/journal.pone.0129606), 2015-07-06
Supplement: pone.0129606.s003.pdf [file pone.0129606.s003.pdf]

The AIC's of different methods for data simulated under ZIP distribution with  $\phi_c = 80\%$ .

| parameters |            | One part models |         |      | Hurdle/ZI models |             |          |
|------------|------------|-----------------|---------|------|------------------|-------------|----------|
| $\phi_t$   | $\gamma_1$ | LOLS            | Poisson | NB   | 2P-LOLS          | PH/ZIP      | NBH/ZINB |
| 75%        | 0          | 2401            | 2663    | 1870 | 1778             | <b>1766</b> | 1767     |
|            | 0.2        | 2526            | 2892    | 1947 | 1834             | <b>1820</b> | 1821     |
|            | 0.6        | 2808            | 3513    | 2105 | 1932             | <b>1911</b> | 1913     |
| 80%        | 0          | 2274            | 2497    | 1713 | 1631             | <b>1620</b> | 1621     |
|            | 0.2        | 2390            | 2718    | 1783 | 1682             | <b>1669</b> | 1671     |
|            | 0.6        | 2642            | 3283    | 1921 | 1764             | <b>1746</b> | 1748     |
| 85%        | 0          | 2134            | 2302    | 1548 | 1473             | <b>1463</b> | 1464     |
|            | 0.2        | 2235            | 2497    | 1608 | 1517             | <b>1506</b> | 1507     |
|            | 0.6        | 2439            | 2979    | 1707 | 1567             | <b>1553</b> | 1554     |
