# Supplementary material for: Assessment and Selection of Competing Models for Zero-Inflated Microbiome Data
Source: PubMed Central journal article supplement (PMC4493133; doi:10.1371/journal.pone.0129606), 2015-07-06
Supplement: pone.0129606.s004.pdf [file pone.0129606.s004.pdf]

The AIC's of different methods for data simulated under ZINB distribution with  $\phi_c = 50\%$ .

| parameters |            | One part models |         |      | Hurdle/ZI models |        |             |
|------------|------------|-----------------|---------|------|------------------|--------|-------------|
| $\phi_t$   | $\gamma_1$ | LOLS            | Poisson | NB   | 2P-LOLS          | PH/ZIP | NBH/ZINB    |
| 45%        | 0          | 3336            | 4694    | 3016 | 3006             | 3282   | <b>2996</b> |
|            | 0.2        | 3490            | 5092    | 3144 | 3133             | 3480   | <b>3121</b> |
|            | 0.6        | 3817            | 6120    | 3403 | 3389             | 3962   | <b>3371</b> |
| 50%        | 0          | 3267            | 4617    | 2926 | 2916             | 3182   | <b>2906</b> |
|            | 0.2        | 3406            | 4988    | 3036 | 3025             | 3350   | <b>3013</b> |
|            | 0.6        | 3723            | 5999    | 3281 | 3265             | 3794   | <b>3248</b> |
| 55%        | 0          | 3177            | 4501    | 2813 | 2801             | 3049   | <b>2792</b> |
|            | 0.2        | 3324            | 4883    | 2933 | 2919             | 3224   | <b>2908</b> |
|            | 0.6        | 3620            | 5872    | 3155 | 3135             | 3632   | <b>3120</b> |
