# Supplementary material for: Assessment and Selection of Competing Models for Zero-Inflated Microbiome Data
Source: PubMed Central journal article supplement (PMC4493133; doi:10.1371/journal.pone.0129606), 2015-07-06
Supplement: pone.0129606.s005.pdf [file pone.0129606.s005.pdf]

The parameter estimate of the gender effect and goodness of fit for bacteria *Anaerotruncus* (proportion of zeros: 18%) using different methods.

| Model      | Logit*              |              | Count distribution    |                       | P-value for overall effect** | AIC                      |
|------------|---------------------|--------------|-----------------------|-----------------------|------------------------------|--------------------------|
|            | $\beta_1$ (SE)      | $Pr(>  t )$  | $\gamma_1$ (SE)       | $Pr(>  t )$           |                              |                          |
| LOLS       | NA                  | NA           | -0.368 (0.107)        | $6.48 \times 10^{-4}$ | $6.48 \times 10^{-4}$        | 3082 <sup>††</sup>       |
| Poisson    | NA                  | NA           | -0.371 (0.029)        | $< 10^{-6}$           | $< 10^{-6}$                  | 9950                     |
| NB         | NA                  | NA           | -0.330 (0.129)        | 0.010                 | 0.010                        | 3083 <sup>†††</sup>      |
| WRS        | NA                  | NA           | NA                    | NA                    | 0.002                        | NA                       |
| 2P-LOLS    | 0.730(0.251)        | 0.004        | -0.238 (0.120)        | 0.047                 | 0.002                        | 3140                     |
| PH         | 0.715(0.252)        | 0.005        | -0.260 (0.029)        | $< 10^{-6}$           | $1.78 \times 10^{-4}$        | 8748                     |
| ZIP        | 0.710 (0.252)       | 0.005        | -0.260 (0.029)        | $< 10^{-6}$           | $1.76 \times 10^{-4}$        | 8770                     |
| <b>NBH</b> | <b>0.715(0.252)</b> | <b>0.005</b> | <b>-0.237 (0.157)</b> | <b>0.130</b>          | <b>0.006</b>                 | <b>3075</b> <sup>†</sup> |
| ZINB       | 7.260 (24.705)      | 0.769        | -0.298 (0.137)        | 0.029                 | 0.034                        | 3089                     |
| 2P-WRS     | NA                  | NA           | NA                    | NA                    | 0.005                        | NA                       |
