# Supplementary material for: Assessment and Selection of Competing Models for Zero-Inflated Microbiome Data
Source: PubMed Central journal article supplement (PMC4493133; doi:10.1371/journal.pone.0129606), 2015-07-06
Supplement: pone.0129606.s006.pdf [file pone.0129606.s006.pdf]

The parameter estimate of the gender effect and goodness of fit for bacteria *Dehalobacterium* (proportion of zeros: 50%) using different methods. Female is the reference category for gender.

| Model      | Logit*              |              | count distribution   |              | P-value for overall effect** | AIC                     |
|------------|---------------------|--------------|----------------------|--------------|------------------------------|-------------------------|
|            | $\beta_1$ (SE)      | $Pr(>  t )$  | $\gamma_1$ (SE)      | $Pr(>  t )$  |                              |                         |
| LOLS       | NA                  | NA           | -0.059 (0.127)       | 0.641        | 0.641                        | 2736                    |
| Poisson    | NA                  | NA           | 0.030 (0.032)        | 0.338        | 0.338                        | 9373                    |
| NB         | NA                  | NA           | 0.041 (0.208)        | 0.843        | 0.843                        | 2439 <sup>††</sup>      |
| WRS        | NA                  | NA           | NA                   | NA           | 0.598                        | NA                      |
| 2P-LOLS    | 0.059(0.193)        | 0.762        | -0.120 (0.157)       | 0.445        | 0.713                        | 2520                    |
| PH         | 0.036(0.193)        | 0.853        | 0.032 (0.032)        | 0.322        | 0.601                        | 5243                    |
| ZIP        | 0.046 (0.189)       | 0.807        | 0.032 (0.032)        | 0.320        | 0.592                        | 5270                    |
| <b>NBH</b> | <b>0.036(0.193)</b> | <b>0.853</b> | <b>0.049 (0.175)</b> | <b>0.779</b> | <b>0.945</b>                 | <b>2405<sup>†</sup></b> |
| ZINB       | 0.052(0.242)        | 0.828        | 0.040(0.181)         | 0.825        | 0.961                        | 2422 <sup>††</sup>      |
| 2P-WRS     | NA                  | NA           | NA                   | NA           | 0.816                        | NA                      |
