# Supplementary material for: Assessment and Selection of Competing Models for Zero-Inflated Microbiome Data
Source: PubMed Central journal article supplement (PMC4493133; doi:10.1371/journal.pone.0129606), 2015-07-06
Supplement: pone.0129606.s007.pdf [file pone.0129606.s007.pdf]

The type I error rate estimations for different competing models (including OLS and Logistic regression).

| $\phi_c$ | ZIP distributed data |             |             |             |             |             | ZINB distributed data |             |             |             |
|----------|----------------------|-------------|-------------|-------------|-------------|-------------|-----------------------|-------------|-------------|-------------|
|          | 20%                  |             | 50%         |             | 80%         |             | 20%                   |             | 50%         |             |
| $\alpha$ | .05                  | .10         | .05         | .10         | .05         | .10         | .05                   | .10         | .05         | .10         |
| OLS      | .049                 | .104        | .05         | .103        | .051        | .104        | .049                  | .101        | .051        | .102        |
| LOLS     | .052                 | .101        | .051        | .105        | .054        | .104        | .052                  | .101        | .050        | .099        |
| Poisson  | <b>.117</b>          | <b>.193</b> | <b>.205</b> | <b>.287</b> | <b>.273</b> | <b>.361</b> | <b>.345</b>           | <b>.422</b> | <b>.394</b> | <b>.471</b> |
| NB       | .045                 | .090        | .027        | .060        | .028        | .059        | .040                  | .085        | .031        | .069        |
| WRS      | .050                 | .102        | .052        | .105        | .054        | .106        | .053                  | .103        | .050        | .099        |
| logistic | .047                 | .089        | .059        | .092        | .046        | .099        | .054                  | .011        | .049        | .098        |
| 2P-TN    | .051                 | .104        | .053        | .106        | .058        | .113        | .039                  | .083        | .034        | .075        |
| 2P-LOLS  | .050                 | .103        | .053        | .110        | .060        | .113        | .054                  | .104        | .051        | .100        |
| PH/ZIP   | .053                 | .104        | .053        | .104        | .054        | .104        | <b>.219</b>           | <b>.306</b> | <b>.224</b> | <b>.309</b> |
| NBH/ZINB | .051                 | .103        | .049        | .098        | .051        | .100        | .051                  | .098        | .057        | .112        |
| 2P-WRS   | .047                 | .099        | .047        | .101        | .044        | 0.094       | .053                  | .103        | .049        | .098        |
