# Supplementary material for: Assessment and Selection of Competing Models for Zero-Inflated Microbiome Data
Source: PubMed Central journal article supplement (PMC4493133; doi:10.1371/journal.pone.0129606), 2015-07-06
Supplement: pone.0129606.s008.pdf [file pone.0129606.s008.pdf]

The relative bias for  $P(y=0)$  for data simulated under ZIP distribution with  $\phi_c = 20\%$ .

| One-part models |            |             |         |        |         |         |        |
|-----------------|------------|-------------|---------|--------|---------|---------|--------|
| parameters      |            | Non-exposed |         |        | Exposed |         |        |
| $\phi_t$        | $\gamma_1$ | LOLS        | Poisson | NB     | LOLS    | Poisson | NB     |
| 15%             | 0          | -0.240      | -0.549  | -0.279 | -0.188  | -0.517  | -0.187 |
|                 | 0.2        | -0.221      | -0.548  | -0.277 | -0.313  | -0.67   | -0.312 |
|                 | 0.6        | -0.173      | -0.55   | -0.263 | -0.585  | -0.904  | -0.583 |
| 20%             | 0          | -0.222      | -0.549  | -0.225 | -0.221  | -0.549  | -0.225 |
|                 | 0.2        | -0.197      | -0.549  | -0.216 | -0.328  | -0.692  | -0.333 |
|                 | 0.6        | -0.135      | -0.55   | -0.179 | -0.558  | -0.907  | -0.553 |
| 25%             | 0          | -0.211      | -0.552  | -0.175 | -0.243  | -0.564  | -0.247 |
|                 | 0.2        | -0.173      | -0.548  | -0.147 | -0.333  | -0.699  | -0.335 |
|                 | 0.6        | -0.105      | -0.549  | -0.093 | -0.53   | -0.903  | -0.519 |

  

| Hurdle/Zero inflated models |            |             |        |          |         |        |          |
|-----------------------------|------------|-------------|--------|----------|---------|--------|----------|
| parameters                  |            | Non-exposed |        |          | Exposed |        |          |
| $\phi_t$                    | $\gamma_1$ | 2P-LOLS     | PH/ZIP | NBH/ZINB | 2P-LOLS | PH/ZIP | NBH/ZINB |
| 15%                         | 0          | 0.008       | 0.002  | 0.002    | 0.008   | 0.000  | 0.000    |
|                             | 0.2        | 0.006       | 0.000  | 0.000    | 0.000   | -0.004 | -0.004   |
|                             | 0.6        | 0.007       | 0.003  | 0.003    | 0.001   | 0.001  | 0.001    |
| 20%                         | 0          | 0.004       | -0.002 | -0.002   | 0.006   | 0.000  | 0.000    |
|                             | 0.2        | 0.003       | -0.003 | -0.003   | 0.001   | -0.001 | -0.001   |
|                             | 0.6        | 0.003       | -0.001 | -0.001   | 0.000   | 0.000  | 0.000    |
| 25%                         | 0          | -0.001      | -0.007 | -0.007   | 0.004   | -0.001 | -0.001   |
|                             | 0.2        | 0.008       | 0.002  | 0.002    | 0.002   | 0.000  | 0.000    |
|                             | 0.6        | 0.003       | -0.001 | -0.001   | 0.001   | 0.001  | 0.001    |
