# Supplementary material for: Assessment and Selection of Competing Models for Zero-Inflated Microbiome Data
Source: PubMed Central journal article supplement (PMC4493133; doi:10.1371/journal.pone.0129606), 2015-07-06
Supplement: pone.0129606.s009.pdf [file pone.0129606.s009.pdf]

The relative bias for  $P(y=0)$  for data simulated under ZIP distribution with  $\phi_c = 50\%$ .

| One-part models |            |             |         |        |         |         |        |
|-----------------|------------|-------------|---------|--------|---------|---------|--------|
| parameters      |            | Non-exposed |         |        | Exposed |         |        |
| $\phi_t$        | $\gamma_1$ | LOLS        | Poisson | NB     | LOLS    | Poisson | NB     |
| 45%             | 0          | -0.268      | -0.515  | -0.097 | -0.265  | -0.536  | -0.052 |
|                 | 0.2        | -0.262      | -0.518  | -0.089 | -0.322  | -0.656  | -0.093 |
|                 | 0.6        | -0.241      | -0.515  | -0.054 | -0.441  | -0.855  | -0.177 |
| 50%             | 0          | -0.269      | -0.516  | -0.067 | -0.271  | -0.518  | -0.068 |
|                 | 0.2        | -0.261      | -0.516  | -0.052 | -0.319  | -0.631  | -0.100 |
|                 | 0.6        | -0.243      | -0.518  | -0.017 | -0.426  | -0.832  | -0.173 |
| 55%             | 0          | -0.272      | -0.517  | -0.037 | -0.271  | -0.49   | -0.079 |
|                 | 0.2        | -0.263      | -0.517  | -0.021 | -0.316  | -0.602  | -0.109 |
|                 | 0.6        | -0.243      | -0.516  | 0.020  | -0.411  | -0.803  | -0.169 |

  

| Hurdle/Zero inflated models |            |             |        |          |         |        |          |
|-----------------------------|------------|-------------|--------|----------|---------|--------|----------|
| parameters                  |            | Non-exposed |        |          | Exposed |        |          |
| $\phi_t$                    | $\gamma_1$ | 2P-LOLS     | PH/ZIP | NBH/ZINB | 2P-LOLS | PH/ZIP | NBH/ZINB |
| 45%                         | 0          | 0.003       | 0.001  | 0.001    | 0.004   | 0.002  | 0.002    |
|                             | 0.2        | 0.000       | -0.001 | -0.001   | 0.000   | 0.000  | 0.000    |
|                             | 0.6        | 0.003       | 0.001  | 0.001    | -0.002  | -0.002 | -0.002   |
| 50%                         | 0          | 0.003       | 0.001  | 0.001    | 0.001   | -0.001 | -0.001   |
|                             | 0.2        | 0.003       | 0.001  | 0.001    | 0.001   | 0.000  | 0.000    |
|                             | 0.6        | 0.000       | -0.001 | -0.001   | -0.001  | -0.001 | -0.001   |
| 55%                         | 0          | 0.002       | 0.000  | 0.000    | 0.002   | 0.001  | 0.001    |
|                             | 0.2        | 0.000       | -0.002 | -0.002   | 0.002   | 0.001  | 0.001    |
|                             | 0.6        | 0.001       | 0.000  | 0.000    | 0.000   | 0.000  | 0.000    |
