# Supplementary material for: Assessment and Selection of Competing Models for Zero-Inflated Microbiome Data
Source: PubMed Central journal article supplement (PMC4493133; doi:10.1371/journal.pone.0129606), 2015-07-06
Supplement: pone.0129606.s010.pdf [file pone.0129606.s010.pdf]

The relative bias for  $P(y=0)$  for data simulated under ZIP distribution with  $\phi_c = 80\%$ .

| One-part models |            |             |         |        |         |         |        |
|-----------------|------------|-------------|---------|--------|---------|---------|--------|
| parameters      |            | Non-exposed |         |        | Exposed |         |        |
| $\phi_t$        | $\gamma_1$ | LOLS        | Poisson | NB     | LOLS    | Poisson | NB     |
| 75%             | 0          | -0.241      | -0.285  | -0.025 | -0.25   | -0.339  | 0.005  |
|                 | 0.2        | -0.247      | -0.283  | -0.019 | -0.283  | -0.424  | -0.002 |
|                 | 0.6        | -0.263      | -0.284  | -0.006 | -0.351  | -0.612  | -0.021 |
| 80%             | 0          | -0.234      | -0.284  | -0.007 | -0.234  | -0.284  | -0.007 |
|                 | 0.2        | -0.242      | -0.286  | -0.002 | -0.263  | -0.360  | -0.014 |
|                 | 0.6        | -0.258      | -0.287  | 0.011  | -0.324  | -0.534  | -0.030 |
| 85%             | 0          | -0.225      | -0.283  | 0.010  | -0.217  | -0.227  | -0.020 |
|                 | 0.2        | -0.234      | -0.287  | 0.015  | -0.241  | -0.289  | -0.027 |
|                 | 0.6        | -0.246      | -0.282  | 0.031  | -0.291  | -0.437  | -0.039 |

  

| Hurdle/Zero inflated models |            |             |        |          |         |        |          |
|-----------------------------|------------|-------------|--------|----------|---------|--------|----------|
| parameters                  |            | Non-exposed |        |          | Exposed |        |          |
| $\phi_t$                    | $\gamma_1$ | 2P-LOLS     | PH/ZIP | NBH/ZINB | 2P-LOLS | PH/ZIP | NBH/ZINB |
| 75%                         | 0          | 0.001       | 0.000  | 0.000    | 0.000   | -0.001 | -0.001   |
|                             | 0.2        | 0.002       | 0.001  | 0.001    | 0.000   | 0.000  | 0.000    |
|                             | 0.6        | 0.001       | 0.000  | 0.000    | 0.000   | 0.000  | 0.000    |
| 80%                         | 0          | 0.001       | 0.001  | 0.001    | 0.001   | 0.000  | 0.000    |
|                             | 0.2        | 0.000       | 0.000  | 0.000    | 0.001   | 0.001  | 0.001    |
|                             | 0.6        | 0.000       | -0.001 | -0.001   | 0.000   | 0.000  | 0.000    |
| 85%                         | 0          | 0.001       | 0.001  | 0.001    | 0.000   | -0.001 | -0.001   |
|                             | 0.2        | 0.000       | -0.001 | -0.001   | 0.000   | 0.000  | 0.000    |
|                             | 0.6        | 0.002       | 0.001  | 0.001    | 0.001   | 0.001  | 0.001    |
