# Supplementary material for: Assessment and Selection of Competing Models for Zero-Inflated Microbiome Data
Source: PubMed Central journal article supplement (PMC4493133; doi:10.1371/journal.pone.0129606), 2015-07-06
Supplement: pone.0129606.s011.pdf [file pone.0129606.s011.pdf]

The relative bias for  $P(y=0)$  for data simulated under ZINB distribution with  $\phi_c = 20\%$ .

| One-part models |            |             |         |        |         |         |        |
|-----------------|------------|-------------|---------|--------|---------|---------|--------|
| parameters      |            | Non-exposed |         |        | Exposed |         |        |
| $\phi_t$        | $\gamma_1$ | LOLS        | Poisson | NB     | LOLS    | Poisson | NB     |
| 15%             | 0          | -0.25       | -0.721  | -0.055 | -0.238  | -0.736  | 0.002  |
|                 | 0.2        | -0.237      | -0.724  | -0.055 | -0.273  | -0.827  | -0.008 |
|                 | 0.6        | -0.16       | -0.726  | -0.052 | -0.359  | -0.948  | -0.042 |
| 20%             | 0          | -0.250      | -0.723  | -0.027 | -0.252  | -0.725  | -0.028 |
|                 | 0.2        | -0.238      | -0.726  | -0.025 | -0.285  | -0.815  | -0.041 |
|                 | 0.6        | -0.207      | -0.723  | -0.013 | -0.365  | -0.941  | -0.077 |
| 25%             | 0          | -0.251      | -0.723  | 0.002  | -0.262  | -0.709  | -0.054 |
|                 | 0.2        | -0.238      | -0.726  | 0.007  | -0.293  | -0.8    | -0.068 |
|                 | 0.6        | -0.206      | -0.723  | 0.025  | -0.371  | -0.933  | -0.107 |

  

| Hurdle/Zero inflated models |            |             |        |          |         |        |          |
|-----------------------------|------------|-------------|--------|----------|---------|--------|----------|
| parameters                  |            | Non-exposed |        |          | Exposed |        |          |
| $\phi_t$                    | $\gamma_1$ | 2P-LOLS     | PH/ZIP | NBH/ZINB | 2P-LOLS | PH/ZIP | NBH/ZINB |
| 15%                         | 0          | 0.022       | 0.001  | 0.001    | 0.023   | -0.002 | -0.002   |
|                             | 0.2        | 0.025       | 0.001  | 0.001    | 0.021   | -0.001 | -0.001   |
|                             | 0.6        | 0.029       | -0.002 | -0.002   | 0.015   | -0.001 | -0.001   |
| 20%                         | 0          | 0.023       | 0.002  | 0.002    | 0.021   | 0.000  | 0.000    |
|                             | 0.2        | 0.024       | 0.000  | 0.000    | 0.020   | 0.002  | 0.002    |
|                             | 0.6        | 0.033       | 0.002  | 0.002    | 0.016   | 0.003  | 0.003    |
| 25%                         | 0          | 0.022       | 0.001  | 0.001    | 0.020   | 0.001  | 0.001    |
|                             | 0.2        | 0.023       | -0.001 | -0.001   | 0.019   | 0.003  | 0.003    |
|                             | 0.6        | 0.032       | 0.001  | 0.001    | 0.014   | 0.003  | 0.003    |
