# Supplementary material for: Assessment and Selection of Competing Models for Zero-Inflated Microbiome Data
Source: PubMed Central journal article supplement (PMC4493133; doi:10.1371/journal.pone.0129606), 2015-07-06
Supplement: pone.0129606.s012.pdf [file pone.0129606.s012.pdf]

The relative bias for  $P(y=0)$  for data simulated under ZINB distribution with  $\phi_c = 50\%$ .

| One-part models |            |             |         |        |         |         |        |
|-----------------|------------|-------------|---------|--------|---------|---------|--------|
| parameters      |            | Non-exposed |         |        | Exposed |         |        |
| $\phi_t$        | $\gamma_1$ | LOLS        | Poisson | NB     | LOLS    | Poisson | NB     |
| 45%             | 0          | -0.291      | -0.591  | -0.033 | -0.293  | -0.623  | 0.002  |
|                 | 0.2        | -0.286      | -0.593  | -0.026 | -0.322  | -0.721  | -0.001 |
|                 | 0.6        | -0.281      | -0.591  | -0.020 | -0.381  | -0.876  | -0.024 |
| 50%             | 0          | -0.293      | -0.592  | -0.014 | -0.292  | -0.592  | -0.014 |
|                 | 0.2        | -0.288      | -0.59   | -0.009 | -0.321  | -0.689  | -0.024 |
|                 | 0.6        | -0.283      | -0.593  | 0.001  | -0.377  | -0.853  | -0.043 |
| 55%             | 0          | -0.293      | -0.59   | 0.006  | -0.293  | -0.56   | -0.03  |
|                 | 0.2        | -0.291      | -0.594  | 0.011  | -0.317  | -0.655  | -0.038 |
|                 | 0.6        | -0.284      | -0.593  | 0.024  | -0.370  | -0.824  | -0.056 |

  

| Hurdle/Zero inflated models |            |             |        |          |         |        |          |
|-----------------------------|------------|-------------|--------|----------|---------|--------|----------|
| parameters                  |            | Non-exposed |        |          | Exposed |        |          |
| $\phi_t$                    | $\gamma_1$ | 2P-LOLS     | PH/ZIP | NBH/ZINB | 2P-LOLS | PH/ZIP | NBH/ZINB |
| 45%                         | 0          | 0.009       | 0.000  | 0.000    | 0.008   | -0.002 | -0.002   |
|                             | 0.2        | 0.010       | -0.001 | -0.001   | 0.018   | 0.011  | 0.011    |
|                             | 0.6        | 0.015       | 0.002  | 0.002    | 0.007   | 0.001  | 0.001    |
| 50%                         | 0          | 0.008       | 0.000  | 0.000    | 0.010   | 0.001  | 0.001    |
|                             | 0.2        | 0.011       | 0.001  | 0.001    | 0.005   | -0.002 | -0.002   |
|                             | 0.6        | 0.012       | -0.001 | -0.001   | 0.005   | 0.000  | 0.000    |
| 55%                         | 0          | 0.010       | 0.001  | 0.001    | 0.007   | 0.000  | 0.000    |
|                             | 0.2        | 0.010       | 0.000  | 0.000    | 0.007   | 0.001  | 0.001    |
|                             | 0.6        | 0.013       | 0.001  | 0.001    | 0.005   | 0.001  | 0.001    |
