# Supplementary material for: Assessment and Selection of Competing Models for Zero-Inflated Microbiome Data
Source: PubMed Central journal article supplement (PMC4493133; doi:10.1371/journal.pone.0129606), 2015-07-06

Histogram of total\_read

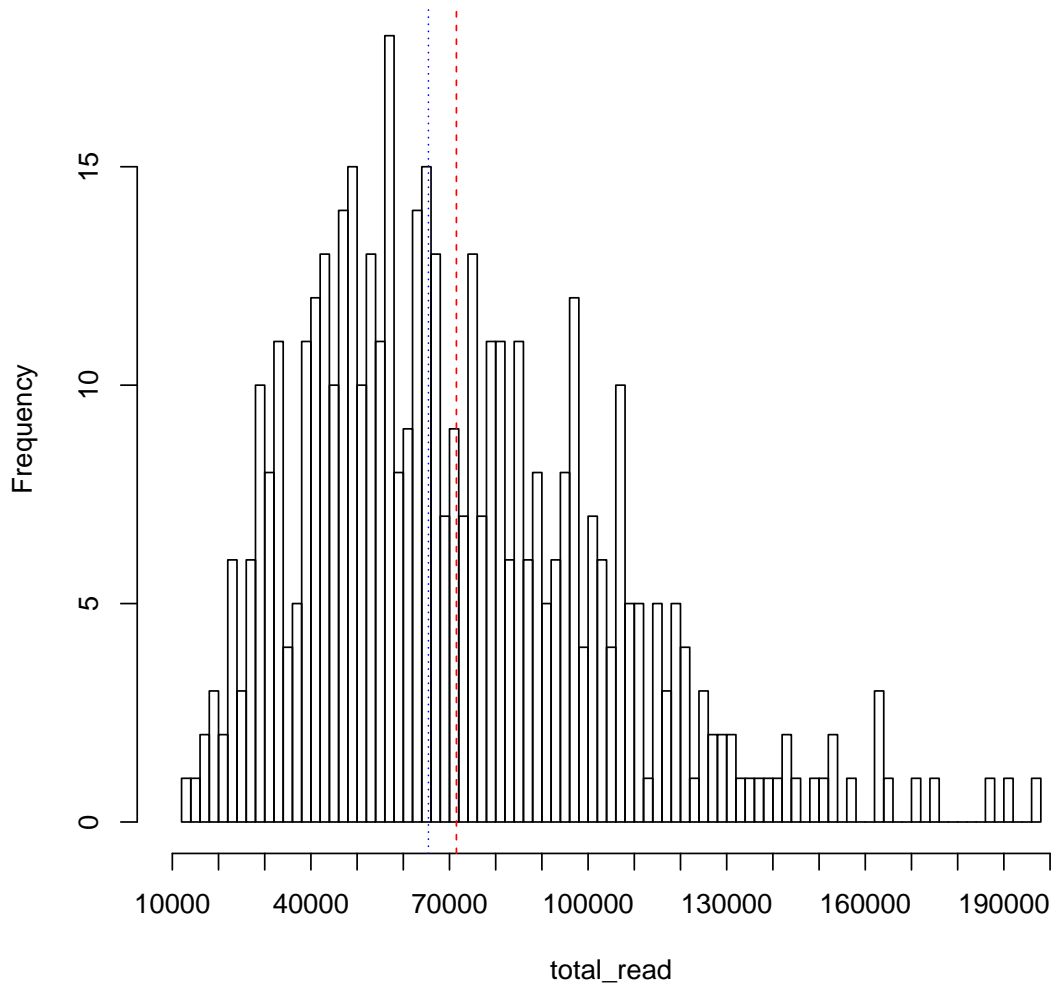

Supplement: pone.0129606.s021.pdf [file pone.0129606.s021.pdf]
